# Supplementary material for: Examining Development Processes for Text Messaging Interventions to Prevent Cardiovascular Disease: Systematic Literature Review
Source: PubMed Central journal article supplement (PMC6460311; doi:10.2196/12191), 2019-03-29
Supplement: mhealth_v7i3e12191_app3.pdf [file mhealth_v7i3e12191_app3.pdf]

Multimedia Appendix 3. Intervention planning: information sources used to identify the key behavioral issues, needs, and challenges that the planned intervention was intended to address

| Trial/ Country (refs)            | Information sources                                                                                                                                                                                                                                                                                                                                                                            |
|----------------------------------|------------------------------------------------------------------------------------------------------------------------------------------------------------------------------------------------------------------------------------------------------------------------------------------------------------------------------------------------------------------------------------------------|
| TEXT ME/ Australia [9, 19, 32]   | <ul style="list-style-type: none"> <li>• Literature review</li> <li>• Examination of relevant behavior change theories</li> <li>• Stakeholder consultation with key peak organizations</li> <li>• Consumer surveys</li> </ul>                                                                                                                                                                  |
| Text4Heart/ New Zealand [21, 29] | <ul style="list-style-type: none"> <li>• Systematic literature review</li> <li>• Examination of relevant theory and behavior change techniques</li> <li>• Stakeholder consultation with cardiac rehabilitation nurses and cardiologists</li> <li>• Observation of a centre-based cardiac rehabilitation program</li> <li>• Examination of current cardiac rehabilitation guidelines</li> </ul> |
| Islam/ Bangladesh [22, 33]       | <ul style="list-style-type: none"> <li>• Literature review</li> <li>• Consultation with experts and other stakeholders</li> <li>• Group-meetings</li> </ul>                                                                                                                                                                                                                                    |
| Heart/ New Zealand [24-26, 30]   | <ul style="list-style-type: none"> <li>• Primary qualitative research to elicit user views of the planned behavior changes</li> <li>• Consultation with experts, members of user groups, other stakeholders</li> <li>• Examination of relevant theory</li> </ul>                                                                                                                               |
| StAR/ South Africa [8, 18]       | <ul style="list-style-type: none"> <li>• Systematic literature review of qualitative studies</li> <li>• Primary qualitative research</li> <li>• Consultation with experts and other stakeholders</li> </ul>                                                                                                                                                                                    |
