# Supplementary material for: Examining Development Processes for Text Messaging Interventions to Prevent Cardiovascular Disease: Systematic Literature Review
Source: PubMed Central journal article supplement (PMC6460311; doi:10.2196/12191), 2019-03-29
Supplement: mhealth_v7i3e12191_app4.pdf [file mhealth_v7i3e12191_app4.pdf]

Multimedia Appendix 4. Intervention development: sources used to inform the development of the intervention

| Trial               | Message content based on:                                                                      | Professionals involved in development of the message content                                                                                                                                                                                                                            | Frequency of the messages based on:                                            | Timing of the messages based on:                                                               | Duration of the intervention based on:                                         | Directionality of the messages (1-way v 2-ways) based on:                      | Level of tailoring based on:                                                   |
|---------------------|------------------------------------------------------------------------------------------------|-----------------------------------------------------------------------------------------------------------------------------------------------------------------------------------------------------------------------------------------------------------------------------------------|--------------------------------------------------------------------------------|------------------------------------------------------------------------------------------------|--------------------------------------------------------------------------------|--------------------------------------------------------------------------------|--------------------------------------------------------------------------------|
| TEXT ME [9, 19, 32] | <ul style="list-style-type: none"> <li>• CG</li> </ul>                                         | <ul style="list-style-type: none"> <li>• Cardiologist</li> <li>• Nurses</li> <li>• Dieticians</li> <li>• Psychologists</li> <li>• Public health and primary care physicians</li> <li>• Patients and public representative</li> </ul>                                                    | <ul style="list-style-type: none"> <li>• LR</li> </ul>                         | <ul style="list-style-type: none"> <li>• LR</li> </ul>                                         | <ul style="list-style-type: none"> <li>• LR</li> </ul>                         | <ul style="list-style-type: none"> <li>• LR</li> </ul>                         | <ul style="list-style-type: none"> <li>• LR</li> </ul>                         |
| Text4Heart [21, 29] | <ul style="list-style-type: none"> <li>• CG</li> </ul>                                         | <ul style="list-style-type: none"> <li>• Health psychologist</li> <li>• Cardiac rehabilitation nurses and cardiologists</li> <li>• End-users</li> </ul>                                                                                                                                 | <ul style="list-style-type: none"> <li>• Previous study<sup>a</sup></li> </ul> | <ul style="list-style-type: none"> <li>• Previous study<sup>a</sup></li> </ul>                 | <ul style="list-style-type: none"> <li>• Previous study<sup>a</sup></li> </ul> | <ul style="list-style-type: none"> <li>• Previous study<sup>a</sup></li> </ul> | <ul style="list-style-type: none"> <li>• Previous study<sup>a</sup></li> </ul> |
| Islam [22, 33]      | <ul style="list-style-type: none"> <li>• CG</li> <li>• Expert opinion</li> </ul>               | <ul style="list-style-type: none"> <li>• Primary care physicians</li> <li>• Diabetologists</li> <li>• Cardiologists</li> <li>• Epidemiologists</li> <li>• Anthropologists</li> <li>• Nurses</li> <li>• Nutritionists</li> <li>• Research Fellows</li> <li>• Medical students</li> </ul> | <ul style="list-style-type: none"> <li>• LR</li> <li>• EC</li> </ul>           | <ul style="list-style-type: none"> <li>• LR</li> <li>• EC</li> </ul>                           | <ul style="list-style-type: none"> <li>• LR</li> <li>• EC</li> </ul>           | <ul style="list-style-type: none"> <li>• EC</li> </ul>                         | None                                                                           |
| Heart [24-26, 30]   | <ul style="list-style-type: none"> <li>• CG</li> <li>• Primary qualitative research</li> </ul> | <ul style="list-style-type: none"> <li>• Investigators</li> <li>• Cardiologists</li> <li>• Nurse specialists</li> <li>• Maori researchers</li> <li>• Exercise physiologists</li> <li>• Behaviour change and public health researchers</li> </ul>                                        | <ul style="list-style-type: none"> <li>• LR</li> </ul>                         | <ul style="list-style-type: none"> <li>• Primary qualitative research</li> <li>• LR</li> </ul> | <ul style="list-style-type: none"> <li>• LR</li> </ul>                         | <ul style="list-style-type: none"> <li>• LR</li> </ul>                         | <ul style="list-style-type: none"> <li>• LR</li> </ul>                         |

|             |                                                                                  |                                                                                                                                                                                                          |                                                        |                                                                                  |                                                        |                                                        |                                                        |
|-------------|----------------------------------------------------------------------------------|----------------------------------------------------------------------------------------------------------------------------------------------------------------------------------------------------------|--------------------------------------------------------|----------------------------------------------------------------------------------|--------------------------------------------------------|--------------------------------------------------------|--------------------------------------------------------|
| StAR[8, 18] | <ul style="list-style-type: none"> <li>• CG</li> <li>• Expert opinion</li> </ul> | <ul style="list-style-type: none"> <li>• Qualitative researchers</li> <li>• Quantitative researchers</li> <li>• Academics</li> <li>• Clinicians</li> <li>• Patient and public representatives</li> </ul> | <ul style="list-style-type: none"> <li>• LR</li> </ul> | <ul style="list-style-type: none"> <li>• Primary qualitative research</li> </ul> | <ul style="list-style-type: none"> <li>• LR</li> </ul> | <ul style="list-style-type: none"> <li>• LR</li> </ul> | <ul style="list-style-type: none"> <li>• LR</li> </ul> |
|-------------|----------------------------------------------------------------------------------|----------------------------------------------------------------------------------------------------------------------------------------------------------------------------------------------------------|--------------------------------------------------------|----------------------------------------------------------------------------------|--------------------------------------------------------|--------------------------------------------------------|--------------------------------------------------------|

CG, clinical guidelines; EC, expert consultation; LR, literature review

a: Data obtained from a previous similar study (process evaluation and pilot testing of HEART trial)
