# Supplementary material for: Examining Development Processes for Text Messaging Interventions to Prevent Cardiovascular Disease: Systematic Literature Review
Source: JMIR Mhealth Uhealth. 2019 Mar 29;7(3):e12191. doi: 10.2196/12191 (PMC6460311; doi:10.2196/12191)
Supplement: Multimedia Appendix 1 [file mhealth_v7i3e12191_app1.pdf]

Multimedia Appendix 1a. Characteristics of the interventions (message customization, personalization, delivery timing, and frequency)

| Trial/<br>Country<br>(refs)         | Message customization                                                                                                          |                                                                                                        |                                                          | Personalization                                                  | Delivery timing                                                                          |                                          |                                                                | Frequency                                                                                                |                                                                                                                                            |
|-------------------------------------|--------------------------------------------------------------------------------------------------------------------------------|--------------------------------------------------------------------------------------------------------|----------------------------------------------------------|------------------------------------------------------------------|------------------------------------------------------------------------------------------|------------------------------------------|----------------------------------------------------------------|----------------------------------------------------------------------------------------------------------|--------------------------------------------------------------------------------------------------------------------------------------------|
|                                     | Generic v individualized                                                                                                       | Ability to update custom settings                                                                      | Simple v complex customization                           |                                                                  | Timing                                                                                   | Random times                             | Specific times                                                 | Number of messages per day or per week                                                                   | Fixed v variable frequency                                                                                                                 |
| TEXT ME/<br>Australia [9, 19, 32]   | Content was partly generic and partly customized to participant' s needs.                                                      | Customization was only at baseline                                                                     | Relatively simple algorithms using minimal baseline data | Yes                                                              | On working days during working hours. Occasional season' s greetings message on holidays | Random delivery times on random weekdays | No (network latency times cannot be measured with confidence). | 1 message per day, average 4 messages per week                                                           | Consistent schedule of 4 messages per week on random weekdays.                                                                             |
| Text4Heart/<br>New Zealand [21, 29] | Individualized timing                                                                                                          | Custom settings could be updated but require participants to phone research centre to request a change | Simple                                                   | Yes- messages tailored to participants' name                     | Preferred time of day to receive messages                                                | No                                       | Yes                                                            | 7 messages per week (1 per day). From weeks 13 to 24, the frequency of messages decreased to 5 per week. | Variable: 7 messages per week from weeks 1 – 12; 5 messages per week from weeks 13-24                                                      |
| Islam/<br>Bangladesh [22, 33]       | Generic                                                                                                                        | Message delivery software allowed to update custom settings                                            | Not applicable                                           | Not personalized                                                 | Random                                                                                   | Between 10 am-5 pm                       | None                                                           | One message per day during a 6 months period                                                             | Fixed                                                                                                                                      |
| Heart/ New Zealand [24-26, 30]      | Individualized depending on prescribed exercise for each<br><br>Week, including duration, frequency, and intensity of exercise | Participants could change their ex prescription but had to phone in to research centre to do so        | Simple                                                   | Personalised to baseline fitness level obtained in Peak VO2 test | Random                                                                                   | Sent randomly during daytime hours       |                                                                | 118 messages over 24 weeks                                                                               | Six messages per week for the first 12 weeks, five messages per week for 6 weeks and then four messages per week for the remaining 6 weeks |

|                            |                                                                                                                                |                                                                                                         |        |                                                                                                |                                               |    |                                                                                                                                                                     |                                                                                                                                        |       |
|----------------------------|--------------------------------------------------------------------------------------------------------------------------------|---------------------------------------------------------------------------------------------------------|--------|------------------------------------------------------------------------------------------------|-----------------------------------------------|----|---------------------------------------------------------------------------------------------------------------------------------------------------------------------|----------------------------------------------------------------------------------------------------------------------------------------|-------|
| StAR/ South Africa [8, 18] | Messages were made available in participants' preferred language (English, isiXhosa and Afrikaans) and timing of the messages. | Customise at baseline, offered option to change language, timing after enrolment using automated system | Simple | Yes, some messages included the name of patients' own clinic or pharmacy or health care worker | Timing according to participants' preferences | No | Yes, timing of some message was related to clinic appointments and medicine collection (information facilitated by secure linkage to computerized appointment data) | Information-only group: 1 message sent weekly for 12-months.<br><br>Interactive SMS group: SMS-text message sent weekly for 12-months. | Fixed |
|----------------------------|--------------------------------------------------------------------------------------------------------------------------------|---------------------------------------------------------------------------------------------------------|--------|------------------------------------------------------------------------------------------------|-----------------------------------------------|----|---------------------------------------------------------------------------------------------------------------------------------------------------------------------|----------------------------------------------------------------------------------------------------------------------------------------|-------|

Multimedia Appendix 1b. Characteristics of the interventions (message content, directionality, character set)

| Trial/ Country (refs)            | Message content                                                                                     |                                                                                                             |                        |                                                                                                                                      |                                                                                    | Directionality                                                                                                                                                                                   | Character set                                      |
|----------------------------------|-----------------------------------------------------------------------------------------------------|-------------------------------------------------------------------------------------------------------------|------------------------|--------------------------------------------------------------------------------------------------------------------------------------|------------------------------------------------------------------------------------|--------------------------------------------------------------------------------------------------------------------------------------------------------------------------------------------------|----------------------------------------------------|
|                                  | Sender signature included in the messages                                                           | Readability level                                                                                           | Message length         | Order of message content (random v sequential)                                                                                       | Unique messaging v repetition                                                      | Unidirectional v bidirectional                                                                                                                                                                   | Unicode allowed?                                   |
| TEXT ME/ Australia [9, 19, 32]   | A full signature was included in the first message. Subsequent messages used abbreviated signature. | 5th-8th – grade reading level                                                                               | 120-160                | Random order.                                                                                                                        | Unique                                                                             | One-way                                                                                                                                                                                          | Capacity to support Unicode (but not implemented). |
| Text4Heart/ New Zealand [21, 29] | Yes, each message began with T4H (Text4Heart)                                                       | Appropriate reading level (rms 800 lexile: approximately age 13 years)                                      | 140 characters or less | Sequential: general informational messages regarding basic heart health sent first, followed by specific behaviour change strategies | Unique (except weekly pedometer count reminder)                                    | Two-way interaction: bidirectional messaging was used because participants were prompted to text in their weekly pedometer step counts and to ask questions or for feedback on other behaviours. | Unclear                                            |
| Islam/ Bangladesh [22, 33]       | Yes                                                                                                 | Readability level not tested, but written using language suitable for those who completed primary education | 160 characters or less | Random order                                                                                                                         | Repetition (all the messages developed were sent twice during the 6 months period) | One-way                                                                                                                                                                                          | Not applicable                                     |
| Heart/ New Zealand [24-26, 30]   | Yes, each message began with HEART:                                                                 | Readability level not tested, but written in plain language, and pre-tested with end-users                  | 140 characters or less | Sequential                                                                                                                           | Unique                                                                             | One way                                                                                                                                                                                          | Unicode not allowed                                |
| StAR/ South Africa [8, 18]       | Yes                                                                                                 | 5th-8th – grade reading level                                                                               | 160 characters or less | Random                                                                                                                               | Unique                                                                             | Two intervention arms were included: one with information only SMS - texts, and one that included an interactive component.                                                                      | Yes (used @ for example)                           |
